# Supplementary material
Source: publisher figshare collection journal article supplement (https://acs.figshare.com/ndownloader/files/3881911)
Supplement: Supplementary file 1 [file 3881911]

*Supporting Information for:*

Uniform Core-shell Photonic Crystal Microbeads as Microcarriers for  
Optical Encoding

Xiaolu Jia, Yuandu Hu, Ke Wang, Ruijing Liang, Jingyi Li, Jianying Wang\*, and  
Jintao Zhu\*

Key Laboratory of Large-Format Battery Materials and Systems of the Ministry of  
Education, School of Chemistry and Chemical Engineering, Huazhong University of  
Science and Technology, Wuhan, 430074, P. R. China

\*Corresponding authors. E-mail: wangjy\_2002@163.com (J. W.); jtzhu@mail.hust.edu.cn (J. Z.)

### Supporting Table and Figures:

**Table S1.** Characteristics of PS-PNIPAm NPs with different sizes at 25 °C.

|                                                  | <b>NP-1</b> | <b>NP-2</b> | <b>NP-3</b> |
|--------------------------------------------------|-------------|-------------|-------------|
| <sup>a</sup> $D_{\text{dry size}}$ (nm)          | 122 ± 4     | 139 ± 5     | 178 ± 3     |
| <sup>b</sup> $D_{\text{hydrodynamic size}}$ (nm) | 135.1       | 149.9       | 193.8       |
| <sup>c</sup> PDI                                 | 0.018       | 0.023       | 0.020       |
| Zeta potential (mv)                              | -25.7       | -24.5       | -29.8       |

**Note:** <sup>a</sup>  $D_{\text{dry size}}$  represents diameter of the PS-PNIPAm NPs in the dry state, which was obtained by measuring 100 NPs from SEM images. <sup>b</sup>  $D_{\text{hydrodynamic size}}$  denotes hydrodynamic diameter of the PS-PNIPAm NPs in aqueous solution which was obtained from DLS measurement. <sup>c</sup> PDI represent the polydispersity index of the PS-PNIPAm NPs which was obtained from DLS measurement.

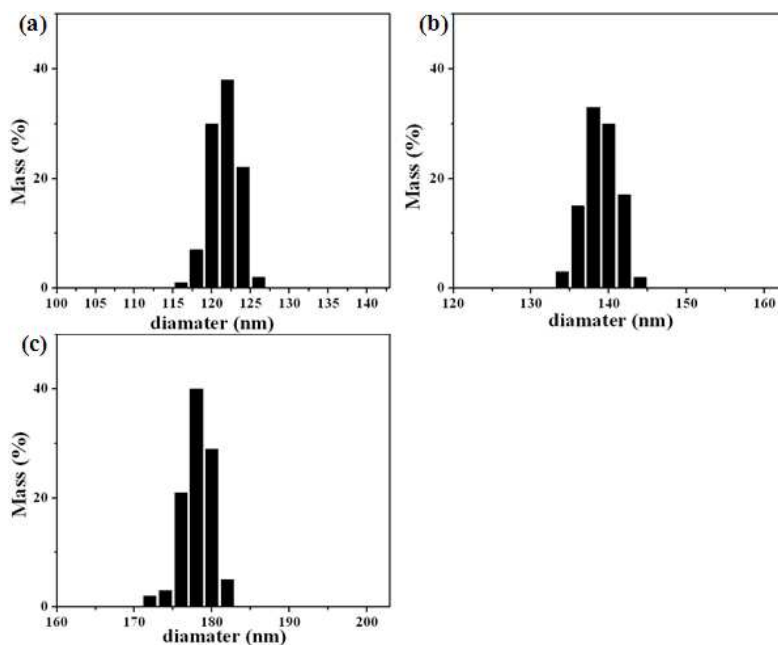

**Figure S1.** Size distribution of PS-PNIPAm NPs with size of (a)  $122 \pm 4$  nm , (b)  $139 \pm 5$  nm and (c)  $178 \pm 3$  nm, respectively. The data was obtained from DLS measurement.

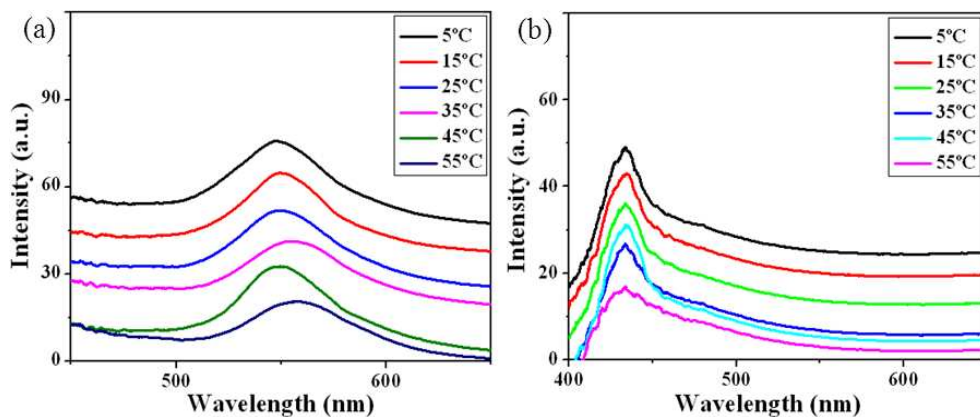

**Figure S2.** Reflection spectra of green (a) and blue (b) core-shell PC microbeads with varied temperature ranging from 5 to 55 °C. Clearly, the core-shell PC microbeads display good stability of reflection peaks when varying temperature.

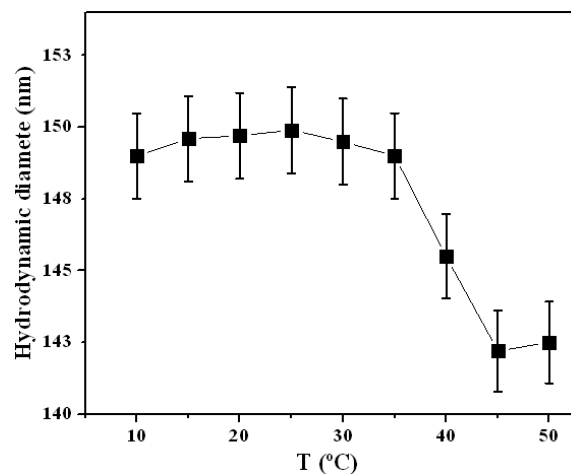

**Figure S3.** Hydrodynamic diameter versus temperature for 139 nm PS-PNIPAm NPs, showing the LCST of  $\sim 35$  °C. The hydrodynamic diameter of the NPs was measured by dynamic light scattering (DLS). A standard goniometer setup (ALV, Langen) was used to perform DLS measurements at various scattering angles. The sample temperature was adjusted using a thermostated toluene bath acting as a temperature and refractive index-matching bath. The temperature was controlled by a PT100 thermoelement, which was placed in the toluene bath close to the sample position. This provided stability in temperature of  $\pm 0.1$  K. The performed laser was a frequency-doubled Nd:YAG laser (Compass Series, Coherent) with  $\lambda$  532 nm providing a constant output power of 150 mW. The recorded intensity time autocorrelation functions were analyzed by inverse Laplace transforms (ILT) using the program CONTIN.

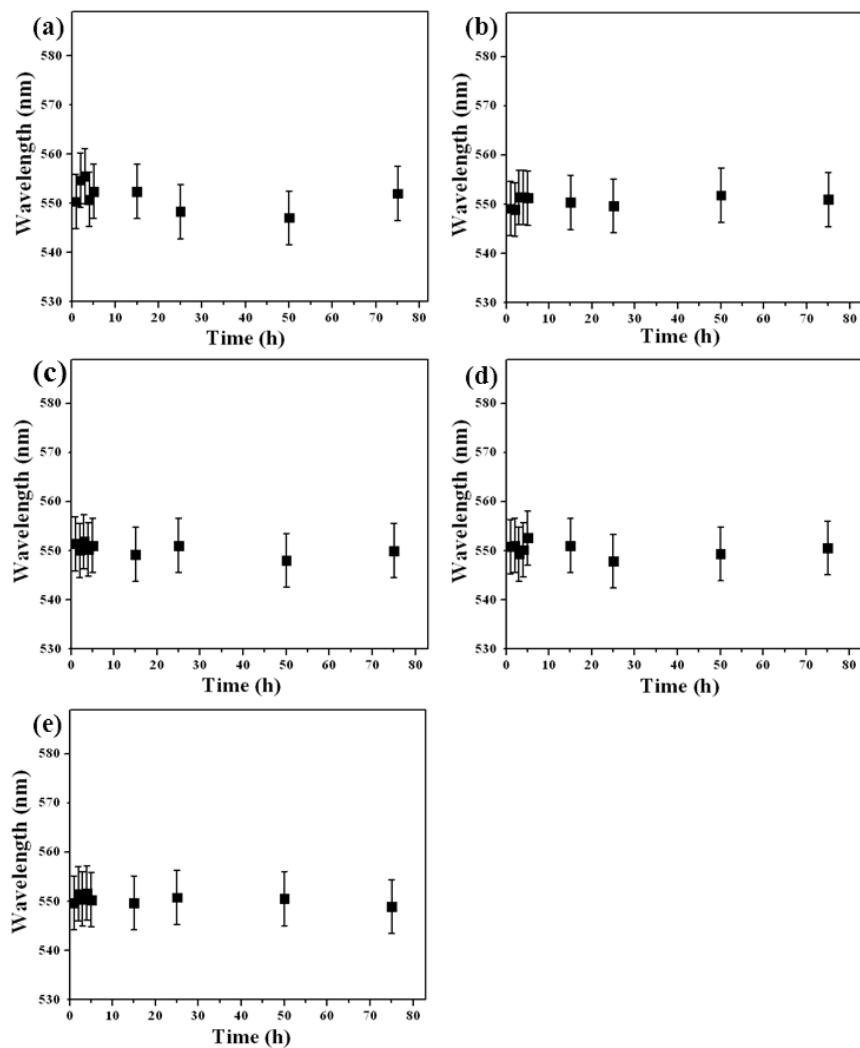

**Figure S4.** (a, b) Diffraction peak position of green core-shell PC microbeads immersed in aqueous NaCl solution with different concentrations: (a) 0.1 M, (b) 1 M, with different time ranging from 1 to 72 h. (c-e) Reflection spectra of the core-shell PC microbeads immersed in aqueous solution with different pH value: (c) pH=7, (d) pH=1, (e) pH=13 with different time ranging from 1 to 72 h.

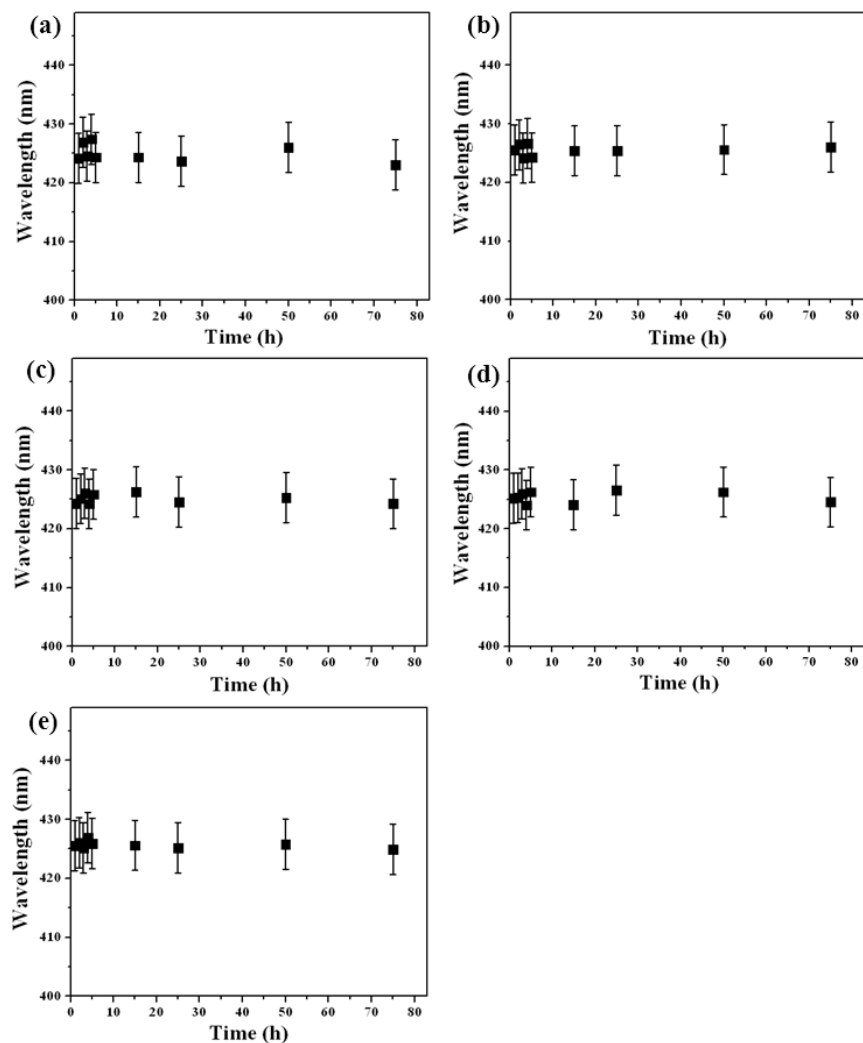

**Figure S5.** (a, b) Diffraction peak position of blue core-shell PC microbeads immersed in aqueous NaCl solution with different concentrations: (a) 0.1 M, (b) 1 M with varied time ranging from 1 to 72 h. (c-e) Reflection spectra of core-shell PC microbeads immersed in aqueous solution with different pH value: (c) pH=7, (d) pH=1, (e) pH=13 with different time ranging from 1 to 72 h.

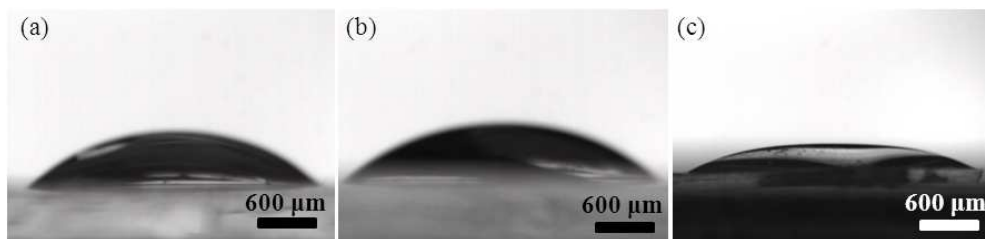

**Figure S6.** Photographs showing the shape of water droplets on different films: (a) ETPTA with a water contact angle (CA) of  $17.5 \pm 1.2^\circ$ , (b) ETPTA and BA ETPTA with a water CA of  $16 \pm 1.2^\circ$ , (c) modified ETPTA and BA with a water CA of  $6.5 \pm 1.2^\circ$ .

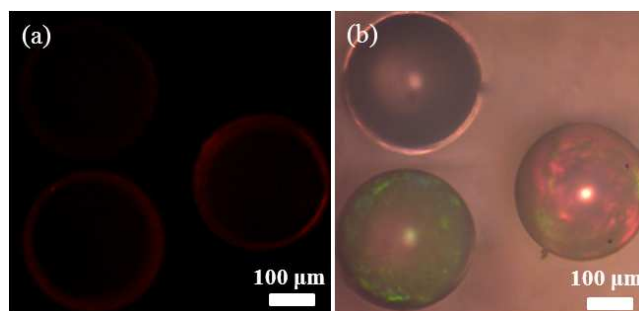

**Figure S7.** Reflection (a) and fluorescence (b) microscopy image of three PC microbeads after incubation with an analyte containing FITC-tagged goat antihuman IgG and FITC-tagged goat antipig IgG, indicating that fluorescence-labeled protein interacts specifically with its probe molecule on the surface of PC microbeads.
